# Supplementary material for: A bifunctional luminescent single-ion magnet: towards correlation between luminescence studies and magnetic slow relaxation processes
Source: Royal Society of Chemistry journal article supplement (doi:10.1039/c2cc35321k), 2012-01-01
Supplement: c2cc35321k.pdf [file c2cc35321k.pdf]

## ELECTRONIC SUPPLEMENTARY INFORMATION

### **Bifunctional Luminescence Single-Ion Magnet: Towards Correlation Between Luminescence Studies and Magnetic Slow Relaxation Processes.**

**Jérôme Long,\*<sup>a</sup> Rémi Vallat,<sup>a</sup> Rute A. S. Ferreira,<sup>b</sup> Luis D. Carlos,<sup>b</sup> Filipe A. Almeida Paz,<sup>c</sup> Yannick Guari<sup>a</sup> and Joulia Larionova<sup>a</sup>**

<sup>a</sup> *Institut Charles Gerhardt Montpellier, UMR 5253, Chimie Moléculaire et Organisation du Solide, Université Montpellier II, Place E. Bataillon, 34095 Montpellier cedex 5, France.*

<sup>b</sup> *Physics department, CICECO, University of Aveiro, 3810 -193 Aveiro, Portugal.*

<sup>c</sup> *Department of Chemistry, CICECO, University of Aveiro, 3810 -193 Aveiro, Portugal.*

## EXPERIMENTAL SECTION

### Syntheses:

All experiments were carried out under aerobic conditions. The lanthanide nitrate salts were purchased from ABCR. All the solvents in these experiments were analytical grade.

The ligand  $H_2L$  ( $H_2 = N,N'$ -bis(3-methoxysalicylidene)-1,2-diaminoethane) has been synthesized according to a well-established procedure from the literature.<sup>1</sup> The  $[ZnL(H_2O)]$  complex has been synthesized by refluxing  $Zn(OAc)_2 \cdot 2H_2O$  with  $H_2L$  in ethanol according to the procedure from the literature.<sup>2</sup>

Synthesis of  $[ZnDy(L)(NO_3)_3(H_2O)]$  (**1**) and  $[Zn(H_2O)(L)Tb(NO_3)_3] \cdot CH_3CN$  (**2**).

The stoichiometric reaction between  $[ZnL(H_2O)]$  (0.78 mmol, 0.320 g) and  $Ln(NO_3)_3 \cdot 6H_2O$  (0.78 mmol) in 20 mL of acetonitrile gives a clear yellow solution upon heating. Slow diffusion of diethyl-ether yields to the formation of yellow crystals which are air stable over a period of several weeks. Yield = 67 % (ZnDy); 68 % (ZnTb). Elemental analysis calcd for  $ZnDyC_{18}H_{20}N_5O_{14}$  (exp.): C 28.51 (28.42), H 2.66 (2.86), N 9.23 (9.20). Elemental analysis calcd for  $ZnTbC_{20}H_{23}N_6O_{14}$  (exp.): C 30.05 (30.11), H 2.90 (3.14), N 10.51 (10.13).

### Single-Crystal X-ray Diffraction Studies

Single-crystals of compounds  $[Zn(NO_3)(L)Dy(NO_3)_2(H_2O)]$  (**1**) and  $[Zn(H_2O)(L)Tb(NO_3)_3] \cdot CH_3CN$  (**2**) (where  $H_2L = N,N'$ -bis(3-methoxysalicylidene)-1,2-diaminoethane) were manually harvested from the crystallization vials and mounted on glass fibers.<sup>3</sup> Data were collected at 173(2) K on an Oxford Instruments Xcalibur Sapphire-2 charge-coupled device (CCD) area-detector diffractometer with a (Mo  $K_\alpha$  graphite-monochromated radiation,  $\lambda = 0.71073$  Å) controlled by the CrysAlis<sup>Pro</sup> software package.<sup>4</sup> Images were processed using the same general software package and data were corrected for absorption (using spherical harmonics) by the multi-scan semi-empirical method implemented in SCALE3 ABSPACK of CrysAlis<sup>Pro</sup>.<sup>5</sup>

Structures were solved employing the Patterson algorithm implemented in the software package SHELXS-97.<sup>4</sup> This approach allowed the location of the two distinct metallic centres composing each individual complex of compounds **1** and **2**. All remaining non-hydrogen atoms were directly located from difference Fourier maps calculated from successive full-matrix least squares refinement cycles on  $F^2$  using SHELXL-97.<sup>6b, 7</sup> In compound **2**, the diethylene group belonging to the chelating  $N,N'$ -bis(3-methoxysalicylidene)-1,2-diaminoethane organic ligand was found to have positional disorder for the carbon atoms. The two locations were refined with fixed rates of occupancy of 0.75 and 0.25 which were found from prior unrestrained refinement studies. Nevertheless, all non-hydrogen atoms in both structures have been successfully refined using anisotropic displacement parameters.

The crystallographically independent hydrogen atoms associated with the sole coordinated water molecule in each compound were directly located from difference Fourier maps and were included in the final structural models with the O–H and H $\cdots$ H distances restrained to 0.95(1) and 1.55(1) Å, respectively, so to ensure a chemically reasonable geometry for this chemical moiety. The isotropic thermal displacement parameter ( $U_{iso}$ ) of the hydrogen atoms were fixed at  $1.5 \times U_{eq}$  of the oxygen atom to which they are attached.

Despite the location of most of the hydrogen atoms bound to carbon could be discerned from difference Fourier maps at the later stages of the refinement procedure, these were instead placed at idealized positions using appropriate *HFIX* instructions in SHELXL: 43 for the aromatic and –CH=N– carbons; 23 for the –CH<sub>2</sub>– groups; 137 for the terminal –CH<sub>3</sub> moieties. All these atoms have been included in subsequent refinement cycles in riding-motion approximation with  $U_{\text{iso}}$  fixed at 1.2 (for the former groups) or  $1.5 \times U_{\text{eq}}$  (only for the latter moieties) of the carbon atom to which they are attached, respectively.

The last difference Fourier map synthesis showed: for **1**, the highest peak ( $0.418 \text{ e}\text{\AA}^{-3}$ ) and deepest hole ( $-0.370 \text{ e}\text{\AA}^{-3}$ ) located at  $0.69 \text{ \AA}$  from C6 and  $0.74 \text{ \AA}$  from Dy1, respectively; for **2**, the highest peak ( $0.424 \text{ e}\text{\AA}^{-3}$ ) and deepest hole ( $-0.358 \text{ e}\text{\AA}^{-3}$ ) located at  $0.65 \text{ \AA}$  from C6 and  $0.99 \text{ \AA}$  from Zn1, respectively.

Information concerning crystallographic data collection and structure refinement details is summarized in Table S3. Tabulated data on the geometrical aspects of the coordination environments of the metallic centers for both compounds, and of the O–H⋯(N,O) hydrogen bonding interactions present in both crystal structures are provided as Tables S4 to S9. Structural drawings have been created using the software package Crystal Impact Diamond.<sup>8</sup>

Crystallographic data (including structure factors) for the two structures reported in this communication have been deposited with the Cambridge Crystallographic Data Centre as supplementary publication nos. CCDC-887656 (for **1**) and -887655 (for **2**). Copies of the data can be obtained free of charge on application to CCDC, 12 Union Road, Cambridge CB2 2EZ, U.K. FAX: (+44) 1223 336033. E-mail: [deposit@ccdc.cam.ac.uk](mailto:deposit@ccdc.cam.ac.uk).

### Magnetic Measurements

Magnetic susceptibility data were collected with a Quantum Design MPMS-XL SQUID magnetometer working between 1.8 – 350 K with the magnetic field up to 7 Tesla. The data were corrected for the sample holder and the diamagnetic contributions calculated from the Pascal's constants (*Theory and Applications of Molecular Paramagnetism*, Eds. Boudreaux, E. A. L.; Mulay, L. John Wiley Sons, New York, 1976).

### Photoluminescence Measurements

The photoluminescence properties were investigated, at room temperature, using a modular double grating excitation spectrofluorimeter with a TRIAX 320 emission monochromator (Fluorolog-3, Horiba Scientific) coupled to a R928 Hamamatsu photomultiplier, using a front face acquisition mode. The excitation source was a 450 W Xe arc lamp. The emission spectra were corrected for detection and optical spectral response of the spectrofluorimeter and the excitation spectra were corrected for the spectral distribution of the lamp intensity using a photodiode reference detector. The room temperature emission decay curves of the  $^5\text{D}_4$  ( $\text{Tb}^{3+}$ ) level were monitored using a modular double grating excitation spectrofluorimeter with a TRIAX 320 emission monochromator (Fluorolog-3, Horiba Scientific) coupled to a R928 Hamamatsu photomultiplier employing a pulsed Xe–Hg lamp (6  $\mu\text{s}$  pulse at half width and 20–30  $\mu\text{s}$  tail). The emission decay curves of the  $^4\text{F}_{9/2}$  ( $\text{Dy}^{3+}$ ) excited state were monitored with a Fluorolog TCSPC spectrofluorimeter (Horiba Scientific) coupled to a TBX-04 photomultiplier tube module (950 V), 200 ns time-to-amplitude converter and 70 ns delay. The exciting source was a Horiba-Jobin-Yvon pulsed diode (NanoLED-390, peak at 390 nm, 1.2 ns pulse duration, 1 MHz repetition rate, and 150 ns synchronization delay).

## Figures S1-S14

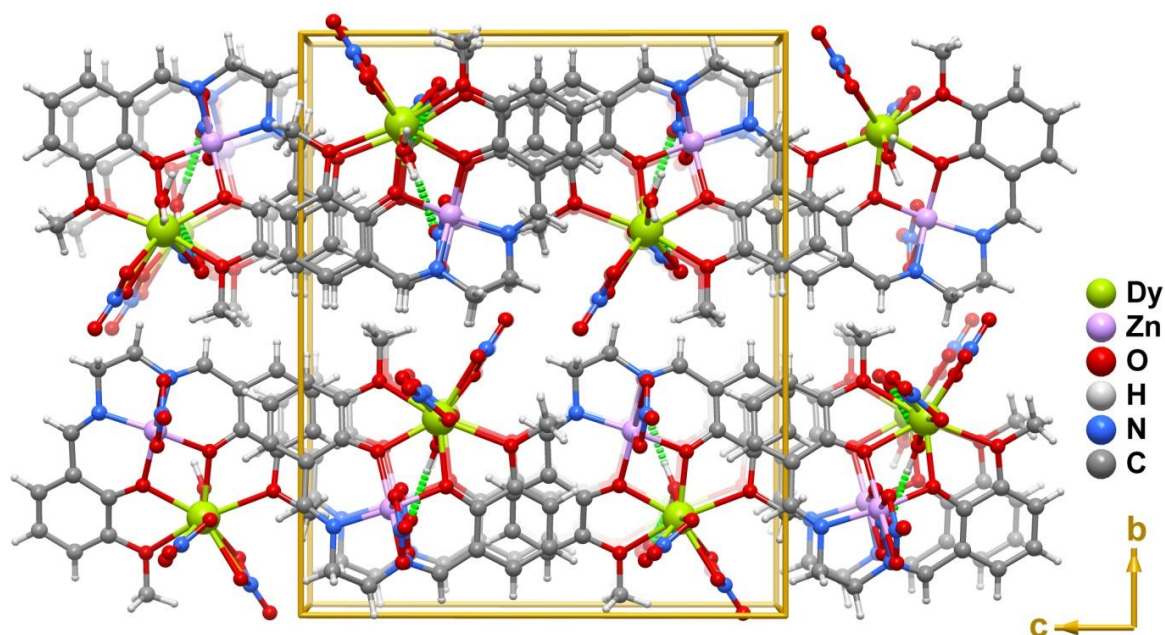

**Figure S1.** Crystal packing of compound  $[\text{Zn}(\text{NO}_3)(\text{L})\text{Dy}(\text{NO}_3)_2(\text{H}_2\text{O})]$  (**1**) viewed in perspective along the  $[100]$  direction of the unit cell.  $\text{O}-\text{H}\cdots\text{O}$  hydrogen bonding interactions connecting adjacent complexes are represented as dashed green lines. For geometrical details on the represented hydrogen bonds see Table S8.

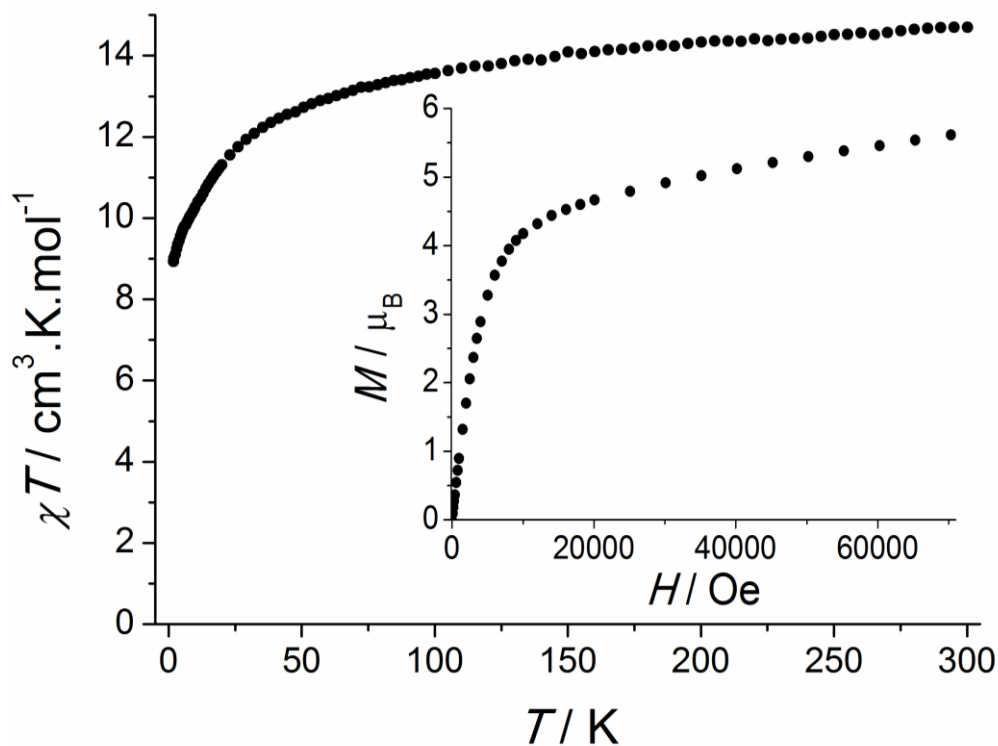

**Figure S2.** Temperature dependence of  $\chi T$  under a 1000 Oe DC field for  $[\text{Zn}(\text{NO}_3)(\text{L})\text{Dy}(\text{NO}_3)_2(\text{H}_2\text{O})]$  (**1**). Inset: Field dependence of the magnetisation at 1.8 K.

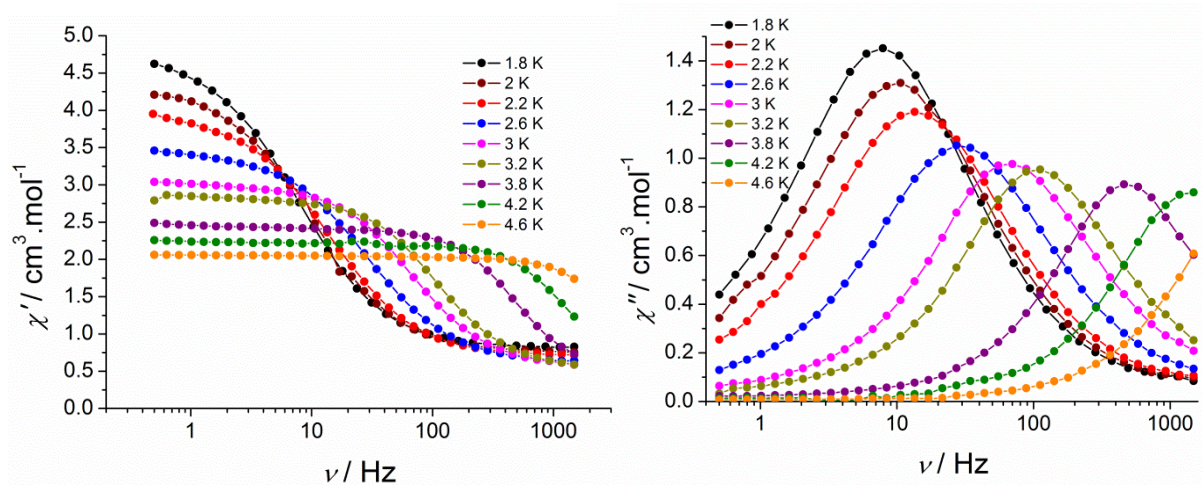

**Figure S3.** Frequency dependence of the in-phase and out-of-phase susceptibilities for  $[\text{Zn}(\text{NO}_3)(\text{L})\text{Dy}(\text{NO}_3)_2(\text{H}_2\text{O})]$  (**1**) under a 900 Oe DC field value for temperature ranging from 1.8 to 4.6 K.

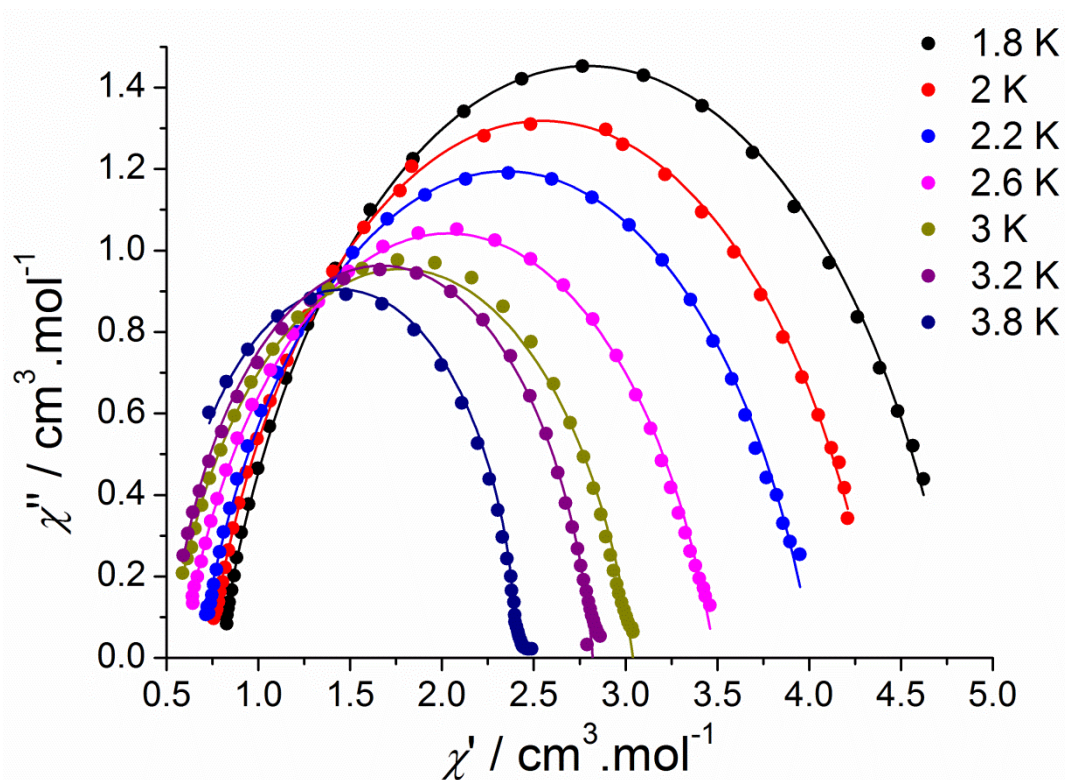

**Figure S4.** Cole-Cole (Argand) plot for  $[\text{Zn}(\text{NO}_3)(\text{L})\text{Dy}(\text{NO}_3)_2(\text{H}_2\text{O})]$  (**1**) obtained using the ac susceptibility data (900 Oe). The solid lines correspond to the best fit obtained with a generalized Debye model.

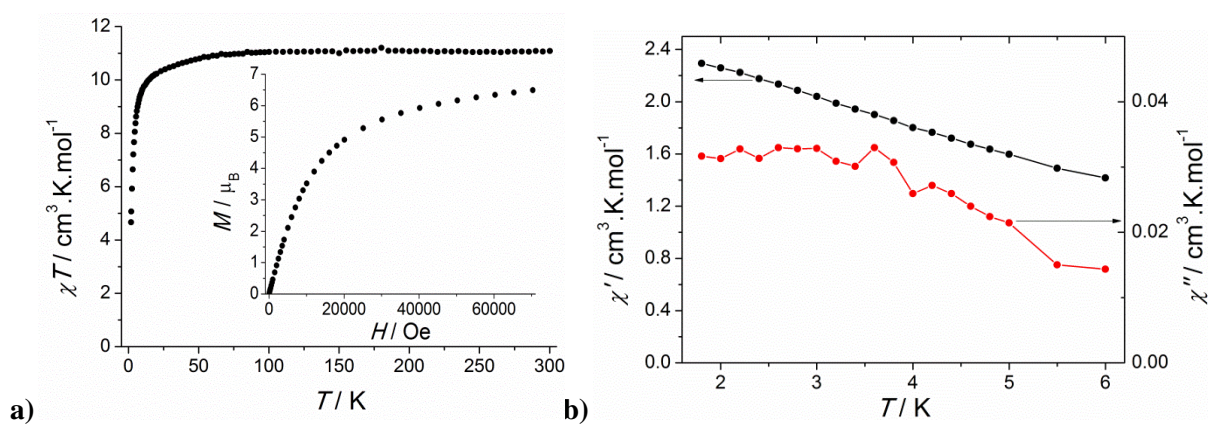

**Figure S5.** a) Temperature dependence of  $\chi T$  under a 1000 Oe DC field for  $[\text{Zn}(\text{H}_2\text{O})(L)\text{Tb}(\text{NO}_3)_3] \cdot \text{CH}_3\text{CN}$  (**2**). Inset: Field dependence of the magnetisation at 1.8 K; b) Temperature dependence of in-phase,  $\chi'$ , and out-of-phase,  $\chi''$ , components of the ac susceptibility for  $[\text{Zn}(\text{H}_2\text{O})(L)\text{Tb}(\text{NO}_3)_3] \cdot \text{CH}_3\text{CN}$  (**2**) performed at 999.87 Hz under a 1600 Oe DC field showing the absence of significant out-of-phase signal.

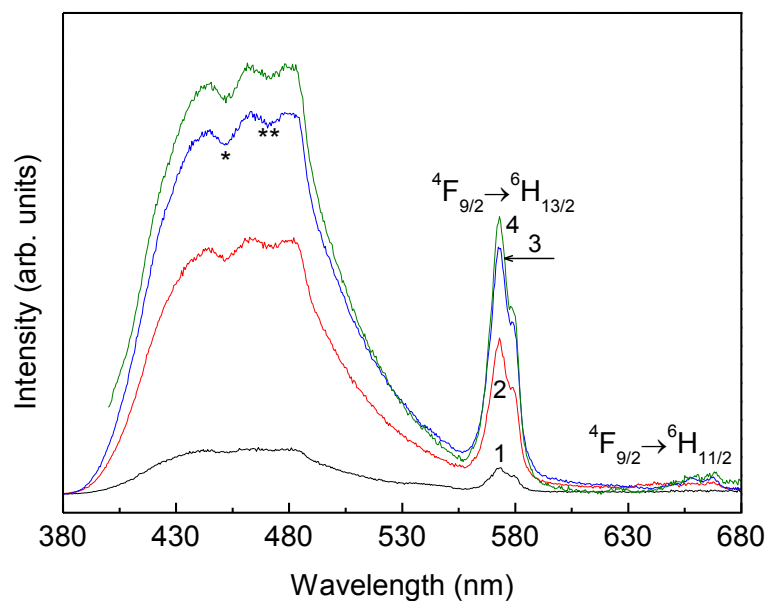

**Figure S6.** Emission spectra of [Zn(NO<sub>3</sub>)(L)Dy(NO<sub>3</sub>)<sub>2</sub>(H<sub>2</sub>O)] (1) excited at (1) 280, (2) 315-320, (3) 360 and (4) 380 nm. The (\*) and (\*\*) denote the Dy<sup>3+</sup>  ${}^4H_{15/2} \rightarrow {}^4I_{15/2}$ ,  ${}^4I_{15/2}$  self-absorptions, respectively.

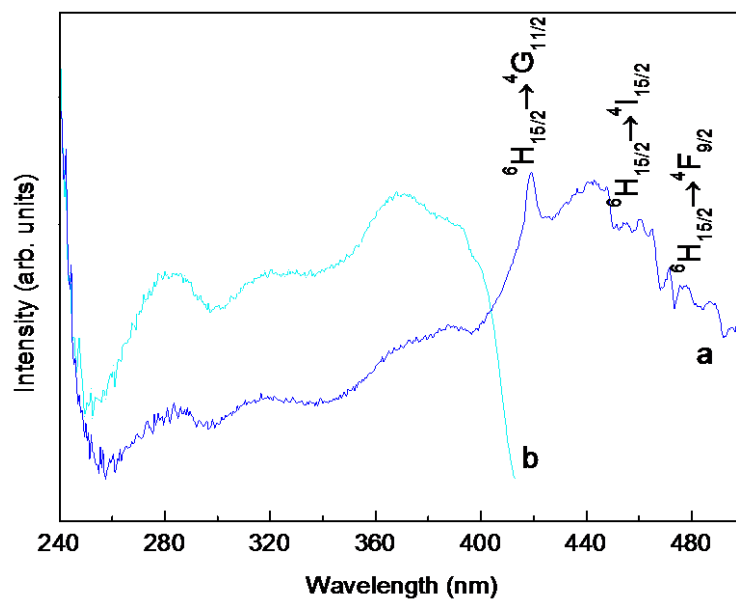

**Figure S7.** Excitation spectra of compounds [Zn(NO<sub>3</sub>)(L)Dy(NO<sub>3</sub>)<sub>2</sub>(H<sub>2</sub>O)] (1) monitored at 573 nm (a) and 460 nm (b).

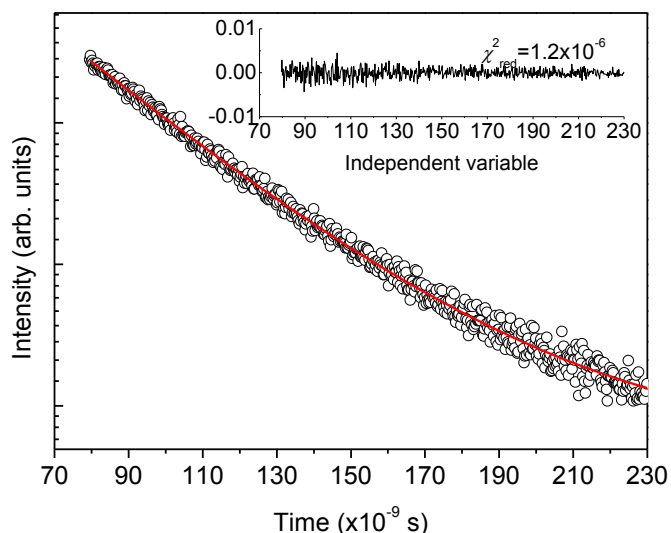

**Figure S8.** Emission decay curve of  $[\text{Zn}(\text{NO}_3)(\text{L})\text{Dy}(\text{NO}_3)_2(\text{H}_2\text{O})]$  (**1**) monitored at 573 nm and excited at 390 nm. The solid line represents the data best fit using a single exponential function. The inset shows the respective regular residual plot and the  $\chi^2_{\text{red}}$  value for a better judgment of the fit quality.

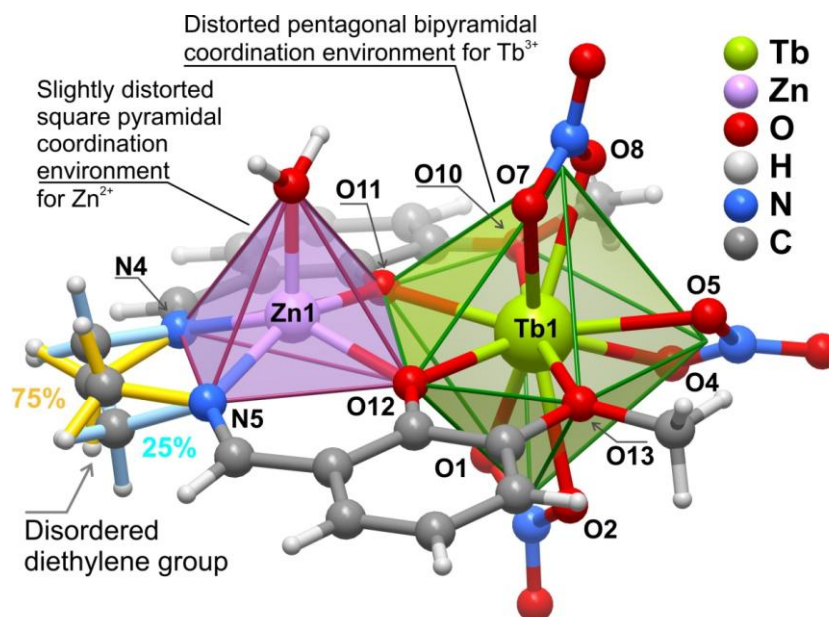

**Figure S9.** Mixed ball-and-stick and polyhedral representation of the dinuclear complex  $[\text{Zn}(\text{H}_2\text{O})(\text{L})\text{Tb}(\text{NO}_3)_3]$  present in compound **2**. For clarity, the coordination polyhedra of  $\text{Zn}^{2+}$  and  $\text{Tb}^{3+}$  are represented as translucent solid objects with the centers of gravity of the coordinated nitrato- $\text{O}, \text{O}'$  being taken as a single coordination site. The atomic labelling scheme for all atoms composing the first coordination sphere of each metallic center is provided. For selected bond lengths and angles of the  $\text{Zn}^{2+}$  and  $\text{Tb}^{3+}$  coordination polyhedra see Tables S6 and S7, respectively.



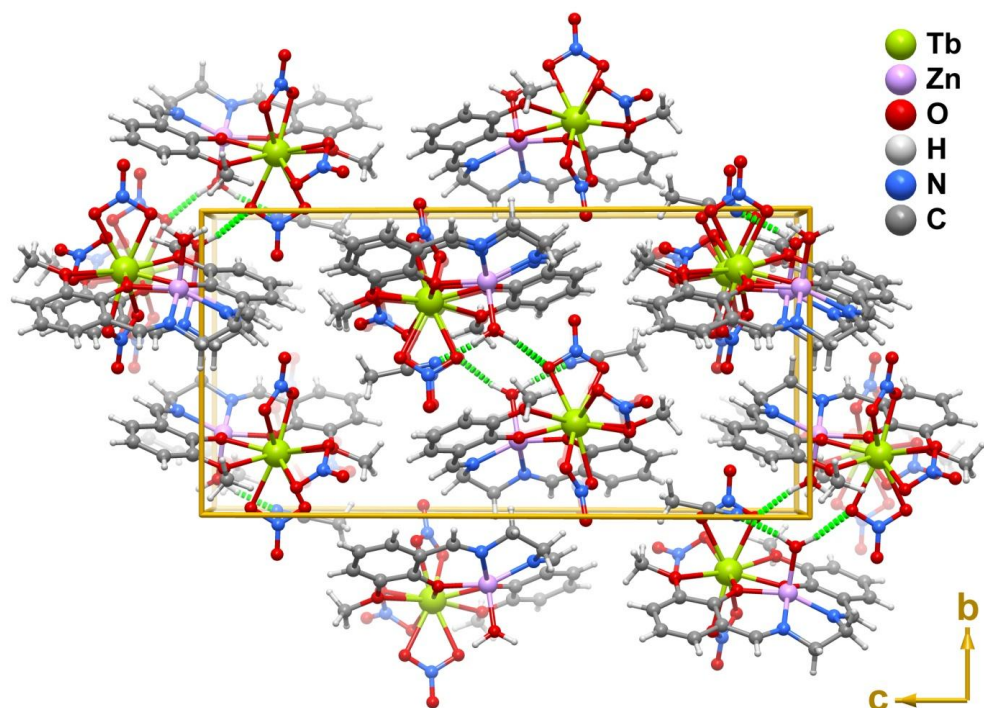

**Figure S10.** Crystal packing of compound  $[\text{Zn}(\text{H}_2\text{O})(\text{L})\text{Tb}(\text{NO}_3)_3] \cdot \text{CH}_3\text{CN}$  (**2**) viewed in perspective along the  $[100]$  direction of the unit cell.  $\text{O}-\text{H} \cdots (\text{N}, \text{O})$  hydrogen bonding interactions connecting adjacent complexes and acetonitrile crystallization solvent molecules are represented as dashed green lines. For geometrical details on the represented hydrogen bonds see Table S9. Please note: for clarity, only the portion with 75% rate of occupancy of the disordered diethylene group (see Figure S8) is represented.

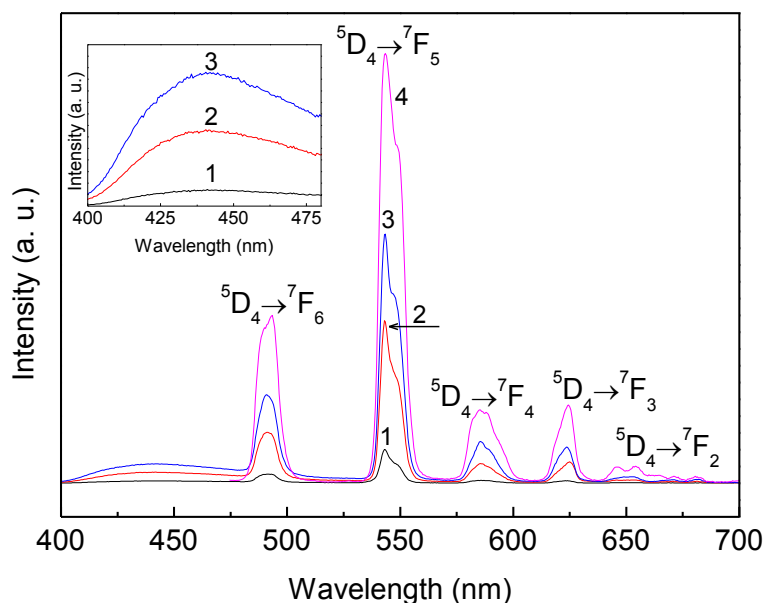

**Figure S11.** Emission spectra of  $[\text{Zn}(\text{H}_2\text{O})(\text{L})\text{Tb}(\text{NO}_3)_3]$  (**2**) excited at (1) 280, (2) 315-320, (3) 360 and (4) 380 nm. The inset shows a magnification ( $\times 10$ ) of the emission in the 400-480 nm range.

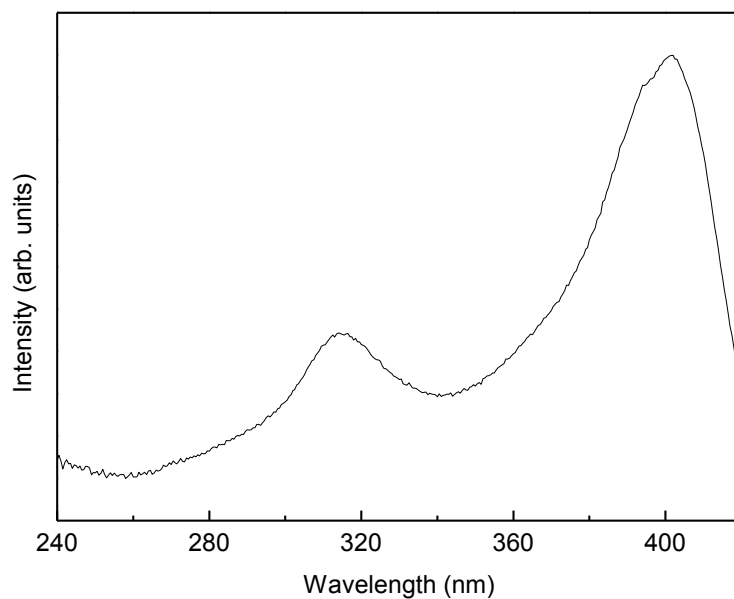

**Figure S12.** Excitation spectra of  $[\text{Zn}(\text{H}_2\text{O})(\text{L})\text{Tb}(\text{NO}_3)_3]$  (**2**) monitored at 543 nm.

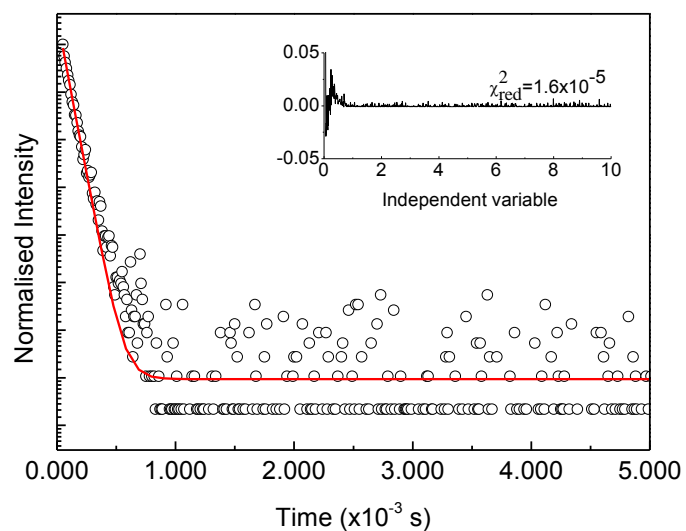

**Figure S13.** Emission decay curve of  $[\text{Zn}(\text{H}_2\text{O})(\text{L})\text{Tb}(\text{NO}_3)_3]$  (**2**) monitored at 543 nm and excited at 315 nm. The solid line represents the data best fit using a single exponential function. The inset shows the respective regular residual plot and the  $\chi^2_{\text{red}}$  value for a better judgment of the fit quality.

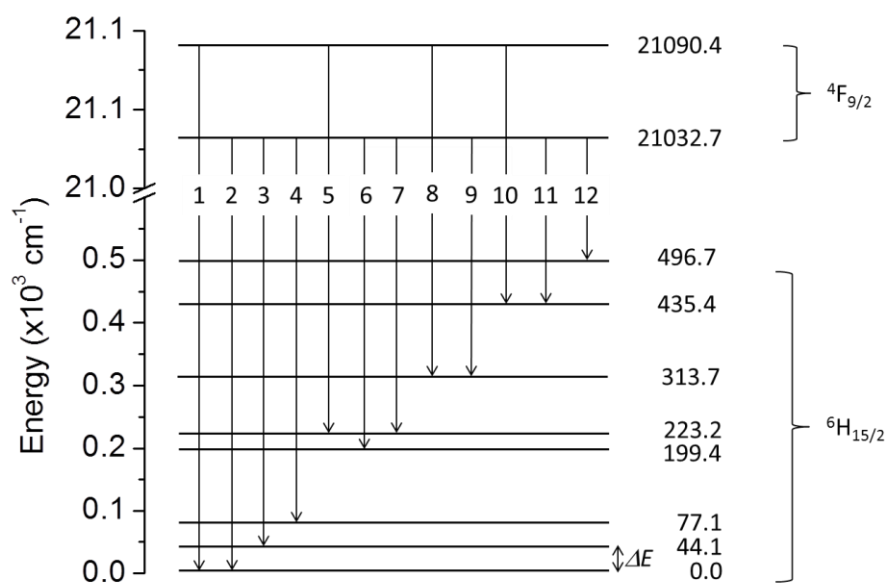

**Figure S14.** Schematic diagram of the radiative transitions between the Stark sublevels of the  ${}^4\text{F}_{9/2}$  and  ${}^6\text{H}_{15/2}$  multiplets of the  $\text{Dy}^{3+}$  ion.

## Tables S1-S9

**Table S1.** Fitting of the Cole-Cole plots with a generalized Debye model for temperature ranging from 1.8 to 3.8 K.

| $T$ (K) | $\alpha$ | $\chi_s$ (cm <sup>3</sup> ·mol <sup>-1</sup> ) | $\chi_T$ (cm <sup>3</sup> ·mol <sup>-1</sup> ) |
|---------|----------|------------------------------------------------|------------------------------------------------|
| 1.8     | 0.252    | 1.214                                          | 4.376                                          |
| 2.0     | 0.254    | 1.115                                          | 3.984                                          |
| 2.2     | 0.264    | 1.048                                          | 3.648                                          |
| 2.6     | 0.260    | 0.899                                          | 3.167                                          |
| 3.0     | 0.213    | 0.741                                          | 2.809                                          |
| 3.2     | 0.128    | 0.650                                          | 2.682                                          |
| 3.8     | 0.080    | 0.495                                          | 2.347                                          |

**Table S2.** Energy peak position ( $E$ ,  $\pm 3.0$  cm<sup>-1</sup>) and full-width-at-half maximum ( $fwhm$ , cm<sup>-1</sup>) of the <sup>4</sup>F<sub>9/2</sub>→<sup>6</sup>H<sub>15/2</sub> Stark components (identified from 1-10) determined from the experimental emission spectrum (acquired at 12 K and excited at 385 nm) best fit ( $\chi^2_{red}=1.7\times 10^{-3}$ ) using a 12-components Gaussian function for [Zn(NO<sub>3</sub>)(L)Dy(NO<sub>3</sub>)<sub>2</sub>(H<sub>2</sub>O)] (**1**).

| Assignment* | $E$     | $fwhm$   |
|-------------|---------|----------|
| 12          | 20536.0 | 80.0±4.8 |
| 11          | 20597.3 | 40.0±1.2 |
| 10          | 20650.5 | 40.0±1.2 |
| 9           | 20719.0 | 38.0±0.8 |
| 8           | 20784.1 | 31.5±1.1 |
| 7           | 20809.5 | 18.9±1.1 |
| 6           | 20833.3 | 24.9±1.1 |
| 5           | 20876.8 | 33.1±1.1 |
| 4           | 20955.6 | 30.0±6.0 |
| 3           | 20988.6 | 17.6±1.5 |
| 2           | 21032.7 | 20.9±2.5 |
| 1           | 21090.4 | 25.0±1.9 |

\* The assignment is illustrated in Figure 4 and Figure S14.

## Crystallographic Tables

**Table S3.** Crystal and structure refinement data for compounds **1** and **2**.

|                                                                           | <b>1</b>                                                            | <b>2</b>                                                            |
|---------------------------------------------------------------------------|---------------------------------------------------------------------|---------------------------------------------------------------------|
| Formula                                                                   | C <sub>18</sub> H <sub>20</sub> DyN <sub>5</sub> O <sub>14</sub> Zn | C <sub>20</sub> H <sub>23</sub> N <sub>6</sub> O <sub>14</sub> TbZn |
| Formula weight                                                            | 758.26                                                              | 795.73                                                              |
| Temperature / K                                                           | 173(2)                                                              | 173(2)                                                              |
| Crystal system                                                            | Monoclinic                                                          | Monoclinic                                                          |
| Space group                                                               | <i>P</i> 2 <sub>1</sub> / <i>n</i>                                  | <i>P</i> 2 <sub>1</sub> / <i>c</i>                                  |
| <i>a</i> /Å                                                               | 7.75620(16)                                                         | 9.59761(16)                                                         |
| <i>b</i> /Å                                                               | 19.2440(4)                                                          | 11.88217(18)                                                        |
| <i>c</i> /Å                                                               | 16.0150(3)                                                          | 23.8362(4)                                                          |
| $\beta$ /°                                                                | 91.3111(18)                                                         | 98.4800(16)                                                         |
| Volume/Å <sup>3</sup>                                                     | 2389.79(8)                                                          | 2688.57(8)                                                          |
| <i>Z</i>                                                                  | 4                                                                   | 4                                                                   |
| <i>D</i> <sub>c</sub> /g cm <sup>-3</sup>                                 | 2.108                                                               | 1.966                                                               |
| $\mu$ (Mo-K $\alpha$ )/mm <sup>-1</sup>                                   | 4.190                                                               | 3.582                                                               |
| F(000)                                                                    | 1484                                                                | 1568                                                                |
| Crystal size/mm                                                           | 0.22×0.10×0.02                                                      | 0.18×0.16×0.11                                                      |
| Crystal type                                                              | Colourless plates                                                   | Colourless blocks                                                   |
| $\theta$ range                                                            | 3.59 to 29.13                                                       | 3.54 to 29.13                                                       |
| Index ranges                                                              | -10 ≤ <i>h</i> ≤ 10<br>-26 ≤ <i>k</i> ≤ 26<br>-21 ≤ <i>l</i> ≤ 21   | -13 ≤ <i>h</i> ≤ 13<br>-16 ≤ <i>k</i> ≤ 16<br>-32 ≤ <i>l</i> ≤ 32   |
| Reflections collected                                                     | 41024                                                               | 88541                                                               |
| Independent reflections                                                   | 6424 ( <i>R</i> <sub>int</sub> = 0.0288)                            | 7220 ( <i>R</i> <sub>int</sub> = 0.0254)                            |
| Data completeness                                                         | 99.8%                                                               | 99.8%                                                               |
| Data / parameters                                                         | 6424 / 360                                                          | 7220 / 406                                                          |
| Final <i>R</i> indices [ <i>I</i> > 2σ( <i>I</i> )] <sup><i>a,b</i></sup> | <i>R</i> 1 = 0.0163<br><i>wR</i> 2 = 0.0339                         | <i>R</i> 1 = 0.0159<br><i>wR</i> 2 = 0.0336                         |
| Final <i>R</i> indices (all data) <sup><i>a,b</i></sup>                   | <i>R</i> 1 = 0.0201<br><i>wR</i> 2 = 0.0348                         | <i>R</i> 1 = 0.0182<br><i>wR</i> 2 = 0.0343                         |
| Weighting scheme <sup><i>c</i></sup>                                      | <i>m</i> = 0.0116<br><i>n</i> = 1.8231                              | <i>m</i> = 0.0088<br><i>n</i> = 2.0900                              |
| Largest diff. peak and hole                                               | 0.418 and -0.370 eÅ <sup>-3</sup>                                   | 0.424 and -0.358 eÅ <sup>-3</sup>                                   |

$$^a R1 = \frac{\sum ||F_o| - |F_c||}{\sum |F_o|}; \quad ^b wR2 = \sqrt{\frac{\sum [w(F_o^2 - F_c^2)^2]}{\sum [w(F_o^2)^2]}}$$

$$^c w = 1 / [\sigma^2(F_o^2) + (mP)^2 + nP] \quad \text{where } P = (F_o^2 + 2F_c^2) / 3$$

**Table S4.** Bond distances (in Å) for the two crystallographically independent metallic coordination environments present in compound [Zn(NO<sub>3</sub>)(L)Dy(NO<sub>3</sub>)<sub>2</sub>(H<sub>2</sub>O)] (1).

---

|         |            |         |            |
|---------|------------|---------|------------|
| Dy1–O1  | 2.4497(13) | Zn1–O7  | 2.0595(13) |
| Dy1–O2  | 2.4324(14) | Zn1–O11 | 2.0294(12) |
| Dy1–O4  | 2.4456(13) | Zn1–O12 | 2.0035(12) |
| Dy1–O5  | 2.4961(13) | Zn1–N4  | 2.0327(15) |
| Dy1–O10 | 2.4907(12) | Zn1–N5  | 2.0376(15) |
| Dy1–O11 | 2.3081(12) |         |            |
| Dy1–O12 | 2.2771(12) |         |            |
| Dy1–O13 | 2.5376(12) |         |            |
| Dy1–O1W | 2.3268(13) |         |            |
| Dy1–N1  | 2.8787(15) |         |            |
| Dy1–N2  | 2.8812(15) |         |            |

---

**Table S5.** Bond angles (in degrees) for the two crystallographically independent metallic coordination environments present in compound [Zn(NO<sub>3</sub>)(L)Dy(NO<sub>3</sub>)<sub>2</sub>(H<sub>2</sub>O)] (1).

|             |           |             |           |
|-------------|-----------|-------------|-----------|
| O1–Dy1–O5   | 70.58(5)  | O11–Dy1–N2  | 81.15(4)  |
| O1–Dy1–O10  | 93.90(4)  | O12–Dy1–O1  | 137.46(5) |
| O1–Dy1–O13  | 78.34(4)  | O12–Dy1–O2  | 130.22(5) |
| O1–Dy1–N1   | 26.21(4)  | O12–Dy1–O4  | 79.67(4)  |
| O1–Dy1–N2   | 72.84(4)  | O12–Dy1–O5  | 117.64(4) |
| O2–Dy1–O1   | 52.32(4)  | O12–Dy1–O10 | 128.30(4) |
| O2–Dy1–O4   | 126.37(5) | O12–Dy1–O11 | 66.76(4)  |
| O2–Dy1–O5   | 110.84(5) | O12–Dy1–O13 | 63.09(4)  |
| O2–Dy1–O10  | 80.90(5)  | O12–Dy1–O1W | 76.51(5)  |
| O2–Dy1–O13  | 80.32(5)  | O12–Dy1–N1  | 140.66(4) |
| O2–Dy1–N1   | 26.11(4)  | O12–Dy1–N2  | 98.02(4)  |
| O2–Dy1–N2   | 123.48(4) | O13–Dy1–N1  | 78.40(4)  |
| O4–Dy1–O1   | 75.36(5)  | O13–Dy1–N2  | 103.07(4) |
| O4–Dy1–O5   | 51.69(4)  | O1W–Dy1–O1  | 121.08(5) |
| O4–Dy1–O10  | 117.28(4) | O1W–Dy1–O2  | 69.05(5)  |
| O4–Dy1–O13  | 78.27(4)  | O1W–Dy1–O4  | 155.89(5) |
| O4–Dy1–N1   | 101.04(5) | O1W–Dy1–O5  | 146.61(5) |
| O4–Dy1–N2   | 26.10(4)  | O1W–Dy1–O10 | 81.18(5)  |
| O5–Dy1–O13  | 125.70(4) | O1W–Dy1–O13 | 87.64(5)  |
| O5–Dy1–N1   | 90.60(4)  | O1W–Dy1–N1  | 95.05(5)  |
| O5–Dy1–N2   | 25.71(4)  | O1W–Dy1–N2  | 164.38(5) |
| O10–Dy1–O5  | 66.27(4)  | N1–Dy1–N2   | 98.20(4)  |
| O10–Dy1–O13 | 160.61(4) |             |           |
| O10–Dy1–N1  | 86.81(4)  | O11–Zn1–O7  | 98.96(5)  |
| O10–Dy1–N2  | 91.30(4)  | O11–Zn1–N4  | 89.52(5)  |
| O11–Dy1–O1  | 145.99(5) | O11–Zn1–N5  | 133.39(6) |
| O11–Dy1–O2  | 138.80(5) | O12–Zn1–O7  | 97.70(5)  |
| O11–Dy1–O4  | 90.80(5)  | O12–Zn1–O11 | 77.45(5)  |
| O11–Dy1–O5  | 76.44(5)  | O12–Zn1–N4  | 152.14(6) |
| O11–Dy1–O10 | 64.71(4)  | O12–Zn1–N5  | 89.38(5)  |
| O11–Dy1–O13 | 129.79(4) | N4–Zn1–O7   | 108.70(6) |
| O11–Dy1–O1W | 83.26(5)  | N4–Zn1–N5   | 81.80(6)  |
| O11–Dy1–N1  | 151.44(4) | N5–Zn1–O7   | 127.26(6) |

**Table S6.** Bond distances (in Å) for the two crystallographically independent metallic coordination environments present in compound  $[\text{Zn}(\text{H}_2\text{O})(L)\text{Tb}(\text{NO}_3)_3]\cdot\text{CH}_3\text{CN}$  (**2**).

---

|         |            |         |            |
|---------|------------|---------|------------|
| Tb1–O1  | 2.4508(12) | Zn1–O11 | 2.0045(11) |
| Tb1–O2  | 2.4574(14) | Zn1–O12 | 2.0180(11) |
| Tb1–O4  | 2.4633(13) | Zn1–O1W | 1.9876(12) |
| Tb1–O5  | 2.4817(13) | Zn1–N4  | 2.0418(14) |
| Tb1–O7  | 2.4635(12) | Zn1–N5  | 2.0263(14) |
| Tb1–O8  | 2.5540(13) |         |            |
| Tb1–O10 | 2.6604(12) |         |            |
| Tb1–O11 | 2.3422(11) |         |            |
| Tb1–O12 | 2.3461(11) |         |            |
| Tb1–O13 | 2.7273(12) |         |            |
| Tb1–N1  | 2.8756(15) |         |            |
| Tb1–N2  | 2.9099(14) |         |            |

---



**Table S7.** Bond angles (in degrees) for the two crystallographically independent metallic coordination environments present in compound  $[\text{Zn}(\text{H}_2\text{O})(\text{L})\text{Tb}(\text{NO}_3)_3]\cdot\text{CH}_3\text{CN}$  (**2**).

|            |           |             |           |
|------------|-----------|-------------|-----------|
| O1–Tb1–O2  | 52.23(4)  | O10–Tb1–O13 | 169.53(4) |
| O1–Tb1–O4  | 71.04(4)  | O10–Tb1–N1  | 95.60(5)  |
| O1–Tb1–O5  | 116.73(4) | O10–Tb1–N2  | 84.07(4)  |
| O1–Tb1–O7  | 163.16(4) | O11–Tb1–O1  | 74.27(4)  |
| O1–Tb1–O8  | 134.53(4) | O11–Tb1–O2  | 116.83(4) |
| O1–Tb1–O10 | 72.99(4)  | O11–Tb1–O4  | 123.21(4) |
| O1–Tb1–O13 | 114.19(4) | O11–Tb1–O5  | 157.42(4) |
| O1–Tb1–N1  | 26.15(4)  | O11–Tb1–O7  | 90.70(4)  |
| O1–Tb1–N2  | 93.63(4)  | O11–Tb1–O8  | 89.42(4)  |
| O2–Tb1–O4  | 71.93(5)  | O11–Tb1–O10 | 61.19(4)  |
| O2–Tb1–O5  | 83.73(5)  | O11–Tb1–O12 | 67.30(4)  |
| O2–Tb1–O7  | 133.58(4) | O11–Tb1–O13 | 127.09(4) |
| O2–Tb1–O8  | 151.38(5) | O11–Tb1–N1  | 96.51(4)  |
| O2–Tb1–O10 | 119.09(4) | O11–Tb1–N2  | 145.11(4) |
| O2–Tb1–O13 | 64.80(4)  | O12–Tb1–O1  | 90.08(4)  |
| O2–Tb1–N1  | 26.13(5)  | O12–Tb1–O2  | 80.53(4)  |
| O2–Tb1–N2  | 75.90(5)  | O12–Tb1–O4  | 152.31(5) |
| O4–Tb1–O5  | 51.49(4)  | O12–Tb1–O5  | 129.03(4) |
| O4–Tb1–O7  | 124.83(4) | O12–Tb1–O7  | 76.89(4)  |
| O4–Tb1–O8  | 84.47(4)  | O12–Tb1–O8  | 122.70(4) |
| O4–Tb1–O10 | 66.37(4)  | O12–Tb1–O10 | 128.33(4) |
| O4–Tb1–O13 | 107.87(4) | O12–Tb1–O13 | 60.83(4)  |
| O4–Tb1–N1  | 67.98(4)  | O12–Tb1–N1  | 86.07(4)  |
| O4–Tb1–N2  | 25.68(4)  | O12–Tb1–N2  | 146.75(4) |
| O5–Tb1–O8  | 68.73(5)  | O13–Tb1–N1  | 89.89(4)  |
| O5–Tb1–O10 | 101.64(4) | O13–Tb1–N2  | 87.78(4)  |
| O5–Tb1–O13 | 68.55(4)  | N1–Tb1–N2   | 83.00(4)  |
| O5–Tb1–N1  | 99.93(4)  |             |           |
| O5–Tb1–N2  | 25.83(4)  | O11–Zn1–O12 | 80.45(4)  |
| O7–Tb1–O5  | 80.01(4)  | O11–Zn1–N4  | 91.28(5)  |
| O7–Tb1–O8  | 50.70(4)  | O11–Zn1–N5  | 153.66(6) |
| O7–Tb1–O10 | 106.71(4) | O12–Zn1–N4  | 142.71(6) |
| O7–Tb1–O13 | 68.78(4)  | O12–Zn1–N5  | 90.56(6)  |
| O7–Tb1–N1  | 157.28(4) | O1W–Zn1–O11 | 98.22(5)  |
| O7–Tb1–N2  | 103.12(4) | O1W–Zn1–O12 | 106.99(5) |
| O8–Tb1–O10 | 62.08(4)  | O1W–Zn1–N4  | 110.17(6) |
| O8–Tb1–O13 | 109.52(4) | O1W–Zn1–N5  | 108.09(6) |
| O8–Tb1–N1  | 150.37(4) | N5–Zn1–N4   | 80.94(6)  |
| O8–Tb1–N2  | 75.86(4)  |             |           |

**Table S8.** Hydrogen bonding geometrical details (distances in Å and angles in degrees) for compound [Zn(NO<sub>3</sub>)(L)Dy(NO<sub>3</sub>)<sub>2</sub>(H<sub>2</sub>O)] (**1**).

| <b>D–H···A</b>            | <b>d(D···A)</b> | <b>&lt;(DHA)</b> |
|---------------------------|-----------------|------------------|
| O1W–H1X···O9 <sup>i</sup> | 2.758(2)        | 176              |
| O1W–H1Y···O6 <sup>i</sup> | 2.766(2)        | 163              |

<sup>a</sup> Symmetry transformations used to generate equivalent atoms:  
 (i) -1+x, y, z.

**Table S9.** Hydrogen bonding geometrical details (distances in Å and angles in degrees) for compound [Zn(NO<sub>3</sub>)(L)Tb(NO<sub>3</sub>)<sub>2</sub>(H<sub>2</sub>O)] (**2**).

| <b>D–H···A</b>              | <b>d(D···A)</b> | <b>&lt;(DHA)</b> |
|-----------------------------|-----------------|------------------|
| O1W–H1X···N100 <sup>i</sup> | 2.728(2)        | 172              |
| O1W–H1Y···O7 <sup>ii</sup>  | 2.7810(16)      | 169              |

<sup>a</sup> Symmetry transformations used to generate equivalent atoms:  
 (i) x, 1+y, z; (ii) 1-x, 2-y, -z.

**Table S10.** Dysprosium geometry analysis by SHAPE<sup>11</sup> for [Zn(NO<sub>3</sub>)(L)Dy(NO<sub>3</sub>)<sub>2</sub>(H<sub>2</sub>O)] (**1**).

| <b>JJCU</b> | <b>CCU</b> | <b>JCSAPR</b> | <b>CSAPR</b> | <b>JTCTPR</b> | <b>TCTPR</b> |
|-------------|------------|---------------|--------------|---------------|--------------|
| 8.990       | 7.201      | 3.965         | 2.611        | 4.275         | 2.543        |

JJCU: Capped cube  
 CCU: Spherical-relaxed capped cube  
 JCSAPR: Capped square antiprism  
 CSAPR: Spherical capped square antiprism  
 JTCTPR: Tricapped trigonal prism  
 TCTPR: Spherical tricapped trigonal prism

## References

1. X. Lü, W. Bi, W. Chai, J. Song, J. Meng, W.-Y. Wong, W.-K. Wong and R. A. Jones, *New. J. Chem.*, 2008, **32**, 127.

2. W.-K. Lo, W.-K. Wong, W.-Y. Wong, J. Guo, K.-T. Yeung, Y.-K. Cheng, X. Yang and R. A. Jones, *Inorg. Chem.*, 2006, **45**, 9315.
3. T. Kottke and D. Stalke, *J. Appl. Crystallogr.*, 1993, **26**, 615-619.
4. *CrysalisPro Software Package, Version 1.171.34.40, Xcalibur Single Crystal CCD Diffractometer; Agilent Technologies, Yarnton, England., 2010.*
5. *SCALE3 ABSPACK: Empirical absorption correction: CrysAlis - Software Package. Oxford Diffraction Ltd., 2006.*
6. (a) G. M. Sheldrick, *SHELXS-97, Program for Crystal Structure Solution, University of Göttingen*, 1997; (b) G. M. Sheldrick, *Acta Cryst. A*, 2008, **64**, 112-122.
7. G. M. Sheldrick, *SHELXL-97, Program for Crystal Structure Refinement, University of Göttingen*, 1997.
8. K. Brandenburg, *DIAMOND, Version 3.2f. Crystal Impact GbR, Bonn, Germany, 1997-2010.*
9. D. Casanova, M. Llunel, P. Alemany, S. Alvarez, *Chem. Eur. J.*, 2005, **11**, 1479.
